1 **Culture conditions antagonize lineage-promoting signaling in the mouse blastocyst**

2

3 Tristan Frum<sup>1,2</sup> and Amy Ralston<sup>1,3</sup>

4

5 1) Department of Biochemistry, Michigan State University, East Lansing, MI, 48824

6 2) Present address: Department of Internal Medicine, Gastroenterology, University of

7 Michigan Medical School, Ann Arbor, MI 48109

8 3) Correspondence: [aralston@msu.edu](mailto:aralston@msu.edu)

9

10

11

12

13 **Abstract**

14 The mouse preimplantation embryo is a paradigm for discovery of the molecular principles  
15 governing formation of specific cell types during development. We show that conditions  
16 commonly used for *ex vivo* culture of preimplantation development are themselves antagonistic  
17 to a pathway that is critical for blastocyst lineage commitment.

18

19 **Introduction**

20 Knowledge of the mechanisms that drive lineage decisions during mouse preimplantation  
21 development can significantly impact fields of stem cell and reproductive biology. Studies of the  
22 first three days of development have shown that the initially totipotent blastomeres of the mouse  
23 embryo adopt one of three cell fates by the blastocyst stage: trophoblast (future placenta),  
24 primitive endoderm (future yolk sac endoderm), or epiblast (future fetus and additional  
25 extraembryonic tissues). Notably, the ultimate ratio of these three cell types is largely invariant  
26 among embryos, indicating that robust regulatory mechanisms exist. Remarkably, lineage  
27 specification is even achieved in incubator-grown preimplantation embryos, raised outside of the  
28 maternal environment, suggesting that the most critical regulatory mechanisms are intrinsic to  
29 the embryo. However, the possibility that culture conditions influence the embryo's signaling  
30 environment cannot be formally excluded.

31

32 Major insight into the roles of cell signaling in preimplantation cell fate decisions has been  
33 provided by studies of the Fibroblast Growth Factor (FGF) signaling pathway (reviewed in  
34 Soszyńska *et al.*, 2019). Culturing embryos in FGF4 and Heparin (referred to as FGF4,  
35 hereafter) causes blastomeres to adopt primitive endoderm, over epiblast, fate (Yamanaka *et*  
36 *al.*, 2010). Importantly, the balance between primitive endoderm and epiblast fates is achieved  
37 through the exquisite regulation of the specific dose of FGF signaling experienced by the  
38 embryo as it develops (Krawchuk *et al.*, 2013).

39

40 The ability to culture preimplantation embryos in the presence of small molecule inhibitors or  
41 agonists of signaling has enabled discovery of the gene regulatory networks crucial for early  
42 mammalian development. For example, artificially tweaking the level of FGF/ERK signaling in  
43 embryos lacking specific transcription factors (*i.e.* transcription factor gene knockouts), can  
44 reveal whether transcription factors function upstream, downstream, or independently of  
45 FGF/ERK signaling. In addition, these assays have provided new insights into the  
46 developmental mechanisms in other mammals, including humans (Kuijk *et al.*, 2012; Roode *et*  
47 *al.*, 2012; Boroviak *et al.*, 2015; Piliszek *et al.*, 2017).

48

49 Culturing mouse embryos in agonists and antagonists of FGF/ERK signaling is routine, yet we  
50 note that this is typically performed in amino acid-containing KSOM medium containing 1 mg/mL  
51 bovine serum albumin (BSA). This raises the possibility that a bovine serum-derived impurity  
52 could alter the embryonic signaling environment. However, this possibility has not been  
53 explored.

54

## 55 **Results and Discussion**

56 To better understand the embryonic signaling environment, we cultured embryos in the  
57 presence of 1 mg/mL polyvinyl alcohol (PVA), a synthetic macromolecule that can replace BSA  
58 in supporting blastocyst development (KSOM without BSA hereafter) (Biggers *et al.*, 1997; Jang  
59 *et al.*, 2007), and provide a more defined medium. In embryos cultured for 66 hours starting  
60 from the 2-cell stage (embryonic day E1.5) in KSOM without BSA, we observed quantitatively  
61 normal specification of trophectoderm, inner cell mass, epiblast and primitive endoderm cell  
62 types (Fig. 1A-C). This observation is consistent with prior evidence that PVA supports  
63 development of mouse blastocysts *in vitro* (Biggers *et al.*, 1997).

64

65 Having established that KSOM without BSA supports blastocyst lineage specification, we then  
66 evaluated the sensitivity of blastocysts to exogenous FGF4 in the absence of BSA. Remarkably,  
67 embryos cultured in KSOM without BSA were sensitive to much lower doses of FGF4 (150  
68 ng/mL) than embryos grown in the presence of BSA (Fig. 1D, E). Higher sensitivity to FGF4 is  
69 due to the absence of BSA, rather than the presence of PVA since BSA antagonized the effects  
70 of FGF4 signaling in the presence of PVA (Fig. 1E). Surprisingly, a dose as low as 25 ng/mL  
71 FGF4 was capable of driving epiblast cells to express primitive endoderm genes when embryos  
72 were cultured in KSOM without BSA (Fig. 1F), which is 20-40 times lower than the FGF4 dose  
73 typically used to convert epiblast to primitive endoderm. This observation suggests that higher  
74 doses of FGF4 are super-physiological. These observations strongly suggest that BSA is  
75 antagonistic to changes in embryonic cell fates induced by exogenous FGF4.

76

77 We do not yet understand the mechanism by which BSA interferes with signaling induced by  
78 exogenous FGF4. There is precedent that BSA can bind heparin, as well as extracellular  
79 signaling pathway members (Francis, 2010). We note that BSA does not appear to interfere with  
80 endogenous signaling, evidenced by the apparently normal lineage specification occurring in  
81 embryos cultured in KSOM with BSA. This could be because BSA in culture cannot penetrate  
82 the blastocyst to interfere with the highly localized FGF signaling occurring within the inner cell  
83 mass. We therefore caution that the routine supplementation with BSA could complicate studies  
84 aimed at understanding the roles and doses of signaling pathways in preimplantation  
85 development.

86

## 87 **Materials and Methods**

88

### 89 **Mouse Stains**

90 All animal care and husbandry for this study was performed in accordance with the guidelines  
91 established by the Institutional Animal Care and Use Committee at Michigan State University.  
92 Embryos in this study were obtained by timed natural matings of CD-1 mice (Charles River)  
93 which utilized males from 6 weeks to 6 months old, and females from 4 weeks to 3 months old.

94

### 95 **Embryo collection and culture**

96 CD-1 embryos were collected at noon the day after observing the presence of a copulation plug  
97 (E1.5) by flushing oviducts with M2 medium (Millipore-Sigma, MR015D). Prior to transfer to the  
98 culture incubator, embryos were washed through 3x drops of embryo culture medium (KSOM  
99 with BSA (Millipore-Sigma, MR121D) or KSOM without BSA (Millipore-Sigma, MR107D) to  
100 remove M2 medium. KSOM without BSA was supplemented with 1 mg/mL PVA from a stock of  
101 100 mg/mL PVA in water (Millipore-Sigma, P8136). Where indicated heparin (Millipore-Sigma,  
102 H3149) and FGF4 (R&D Systems, 235F4025) were added to embryo culture medium. Embryos  
103 were cultured under ES cell grade mineral oil (Millipore-Sigma, ES005C) for 66 hours at 37°C  
104 and 5% CO<sub>2</sub>. Embryo culture medium under mineral oil was equilibrated in the embryo culture  
105 incubator for at least 18 hours prior to the addition of embryos.

106

### 107 **Immunofluorescence and Confocal Microscopy**

108 Embryos were fixed in 4% formaldehyde (Polysciences) for 10 minutes then immediately  
109 permeabilized for 30 minutes in 0.5% Triton X-100 (Millipore-Sigma, T8787) diluted in PBS.  
110 Embryos were stored in blocking buffer (10% FBS (Hyclone), 0.1% Triton X-100, PBS) for at  
111 least 18 hours and no longer than 5 days prior to incubation with primary antibodies. Primary  
112 antibodies were diluted in blocking buffer to the following concentrations: rabbit IgG anti-Nanog  
113 (Reprocell, RCAB002P) 1:400, goat IgG anti-SOX17 (R&D systems, AF1924) 1:2000 and  
114 applied overnight at 4°C. DyLight 488 (Jackson ImmunoResearch, 805485180) and Cyanine3  
115 (Jackson ImmunoResearch, 711165152) conjugated antibodies targeting IgG were diluted at

116 1:400 in blocking buffer and incubated for 1 hour at ambient temperature to detect primary  
117 antibodies. Nuclei were labelled by 5-minute incubation with DRAQ5 (Cell Signaling, 4084)  
118 diluted 1:400 in blocking buffer. Confocal z-stacks spanning the entire embryo were collected  
119 with 5  $\mu\text{m}$  spacing on the Olympus FluoView FV1000 Confocal Laser Scanning Microscope  
120 system with 20x UPlanFLN objective (0.5 NA) and 5x digital zoom.

121

## 122 **Image Analysis**

123 Image analysis was performed in ImageJ (imagej.net). Z-stacks from each embryo were  
124 arranged into a montage and then each cell was manually assigned a TE or ICM identity based  
125 on their position on the embryo surface (TE) or inside the embryo (ICM). Cells classified as ICM  
126 were further manually scored as SOX17 positive or NANOG positive. Pyknotic nuclei, indicating  
127 cell death, and mitotic nuclei were excluded from the analysis, and were less than 2% of all cells  
128 considered for analysis.

129

## 130 **Statistical Analysis**

131 Unpaired two-tailed t-tests were performed in Graphpad Prism 8 for macOS  
132 ([www.graphpad.com](http://www.graphpad.com)).

133

134

## 135 **Acknowledgements**

136 We thank Dr. Jason Knott for insightful comments and suggestions on the manuscript. We  
137 apologize to authors whose work we were unable to cite due to space limitations.

138

## 139 **Author Contributions**

140 AR conceived the study and wrote the paper. TF performed experiments, analyzed data, and  
141 produced the figure.

142

## 143 **Funding**

144 This work was supported by the National Institutes of Health award R35 GM131759 to A.R.

145

## 146 **Figure Legend**

147

### 148 **Figure 1. BSA antagonizes signaling by exogenous FGF4**

149 A) Experimental design for embryos shown and analyzed in this figure. Red = NANOG

150 indicative of epiblast cell fate, green = SOX17 indicative of primitive endoderm cell fate.

151 B) Immunostaining for SOX17 to identify primitive endoderm (PE) cells and NANOG to identify

152 epiblast (EPI) cells in embryos cultured for 66 hours starting from 2-cell stage in KSOM with 1

153 mg/mL BSA or without BSA (Millipore-Sigma MR-121-D and MR-107-D, respectively), but with 1

154 mg/mL added PVA (Sigma 360627). n = number of embryos examined. p = Student's t-test. n.s.

155 = not significant ( $p > 0.2$ ).

156 C) Quantification of the total inner cell mass (ICM) and trophectoderm (TE) cells in embryos

157 cultured in indicated conditions and proportion of ICM cells contributing to PE and EPI in these

158 embryos. Each symbol represents a single embryo, column = mean, and error bars = standard

159 deviations. p = Student's t-test. n.s. = not significant ( $p > 0.2$ ).

160 D) Immunostaining for SOX17 and NANOG in embryos cultured in KSOM + 150 ng/mL FGF4

161 (R&D Systems 235-F4-025) and 1  $\mu$ g/mL Heparin (Sigma H3149) in the presence or absence of

162 1 mg/mL BSA. Each symbol represents a single embryo, column = mean, and error bars =

163 standard deviations. p = Student's t-test. n.s. = not significant ( $p > 0.2$ ).

164 E) Quantification of lineage specification in embryos cultured in conditions indicated. Each

165 symbol represents a single embryo, column = mean, and error bars = standard deviations.

166 F) Response of embryos cultured in KSOM without 1 mg/mL BSA to low dose of exogenous  
167 FGF4 and 1 µg/mL Heparin. Each symbol represents a single embryo, column = mean, and  
168 error bars = standard deviations. p = Student's t-test.

169

## 170 **Declaration of Interests**

171 The authors declare there is no conflict of interest that could be perceived as prejudicing the  
172 impartiality of the research reported.

173

## 174 **References**

175 **Biggers J, Summers MC and McGinnis LK** (1997) Polyvinyl alcohol and amino acids as  
176 substitutes for bovine serum albumin in culture media for mouse preimplantation embryos.

177 *Human Reproduction Update* **3** 125–135.

178 **Boroviak T, Loos R, Lombard P, Okahara J, Behr R, Sasaki E, Nichols J, Smith A and**

179 **Bertone P** (2015) Lineage-Specific Profiling Delineates the Emergence and Progression of  
180 Naive Pluripotency in Mammalian Embryogenesis. *Developmental Cell* **35** 366–382.

181 **Francis GL** (2010) Albumin and mammalian cell culture: implications for biotechnology  
182 applications. *Cytotechnology* **62** 1–16.

183 **Jang M, Lee EJ, Lee ST, Cho M and Lim JM** (2007) Preimplantation and fetal development

184 of mouse embryos cultured in a protein-free, chemically defined medium. *Fertility and*  
185 *Sterility* **87** 445–447.

186 **Krawchuk D, Honma-Yamanaka N, Anani S and Yamanaka Y** (2013) FGF4 is a limiting factor

187 controlling the proportions of primitive endoderm and epiblast in the ICM of the mouse  
188 blastocyst. *Dev Biol* **384** 65–71.

189 **Kuijk EW, van Tol LT, Van de Velde H, Wubbolts R, Welling M, Geijsen N and Roelen BA**

190 (2012) The roles of FGF and MAP kinase signaling in the segregation of the epiblast and  
191 hypoblast cell lineages in bovine and human embryos. *Development* **139** 871–882.



- 192 **Piliszek A, Madeja ZE and Plusa B** (2017) Suppression of ERK signalling abolishes primitive  
193 endoderm formation but does not promote pluripotency in rabbit embryo. *Development* **144**  
194 3719–3730.
- 195 **Roode M, Blair K, Snell P, Elder K, Marchant S, Smith A and Nichols J** (2012) Human  
196 hypoblast formation is not dependent on FGF signalling. *Dev Biol* **361** 358–363.
- 197 **Soszyńska A, Klimczewska K and Suwińska A** (2019) FGF/ERK signaling pathway: How it  
198 operates in mammalian preimplantation embryos and embryo-derived stem cells.  
199 *International Journal of Developmental Biology* **63** 171–186.
- 200 **Yamanaka Y, Lanner F and Rossant J** (2010) FGF signal-dependent segregation of primitive  
201 endoderm and epiblast in the mouse blastocyst. *Development* **137** 715–724.  
202

Figure 1. Frum and Ralston

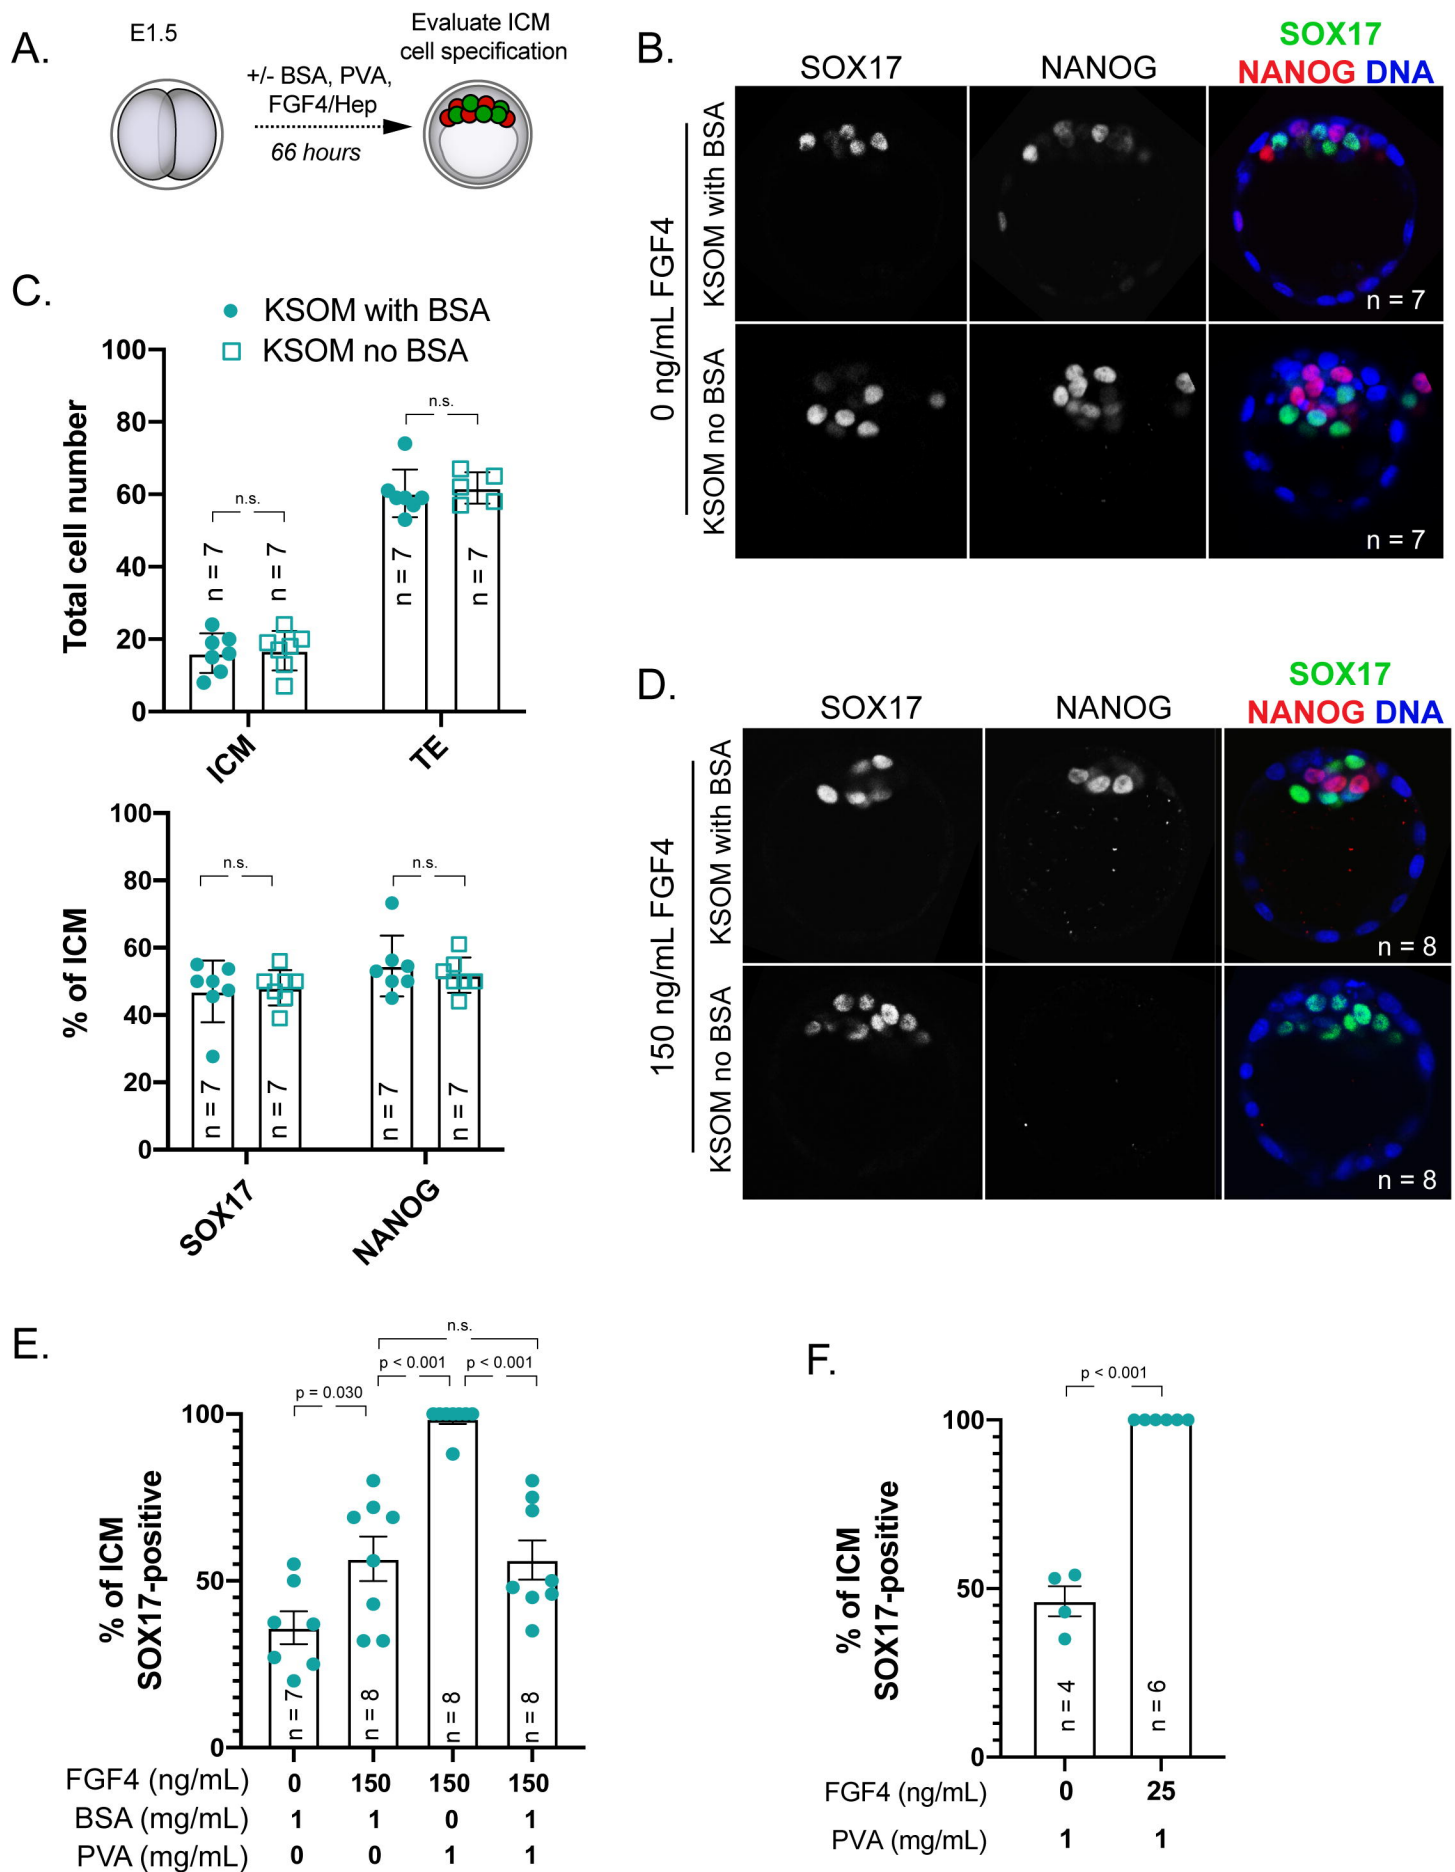

Source: https://www.biorxiv.org/content/10.1101/2020.03.31.016717v1.full.pdf
